# Supplementary material for: Patient Factors in the Dose Selection of Oral Sumatriptan for Acute Migraine: A Post Hoc Analysis of Two Randomized Controlled Studies
Source: Springer Nature journal article supplement (doi:10.1007/s40122-023-00511-3), 2023-04-27
Supplement: MOESM1 [file 25291150]

**SUPPLEMENTARY MATERIAL FOR**

**Patient Factors in the Dose Selection of Oral Sumatriptan for Acute Migraine:  
A Post-Hoc Analysis of Two Randomized Controlled Studies**

Matt Fisher, PharmD<sup>1</sup>; Abhay Aher, MS<sup>1</sup>;

Mako Araga, MS<sup>1</sup>; Billy Franks, PhD<sup>2</sup>

<sup>1</sup>Haleon, Warren, NJ

<sup>2</sup>GlaxoSmithKline Consumer Healthcare B.V., Amersfoort, Netherlands

**Corresponding Author**

Matt Fisher, PharmD

[matthew.j.fisher@haleon.com](mailto:matthew.j.fisher@haleon.com)

**Supplementary Material. Patient disposition.**

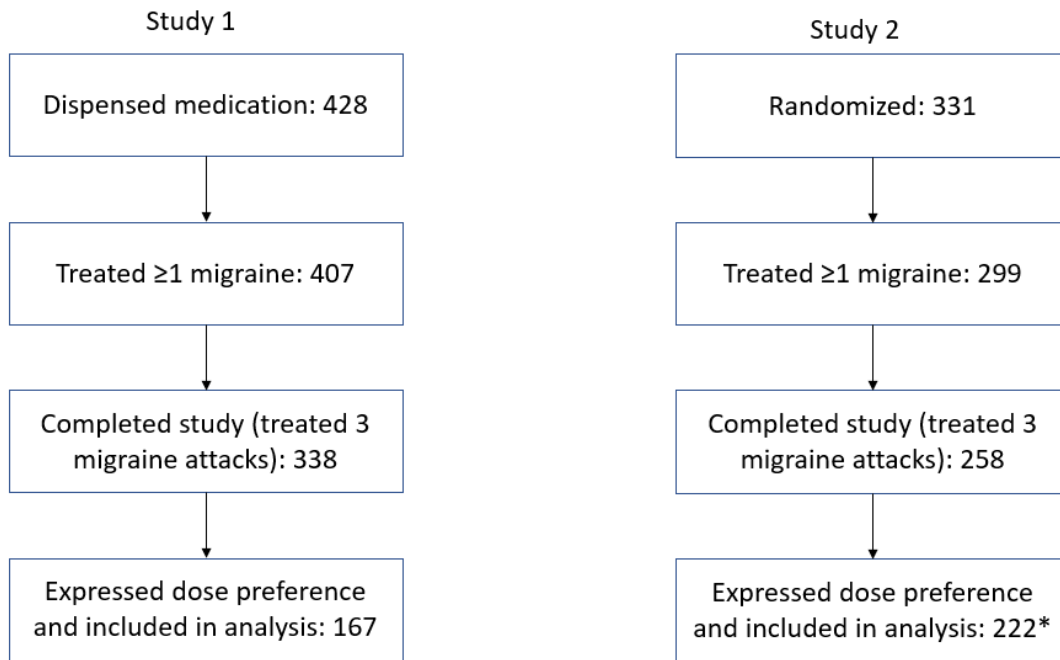

\*A dose preference was expressed by 258 patients, but complete baseline data were missing for 36 patients.
